# Supplementary material for: Genomes of Fasciola hepatica from the Americas Reveal Colonization with Neorickettsia Endobacteria Related to the Agents of Potomac Horse and Human Sennetsu Fevers
Source: PLOS journal article supplement (doi:10.1371/journal.pgen.1006537), 2017-01-06

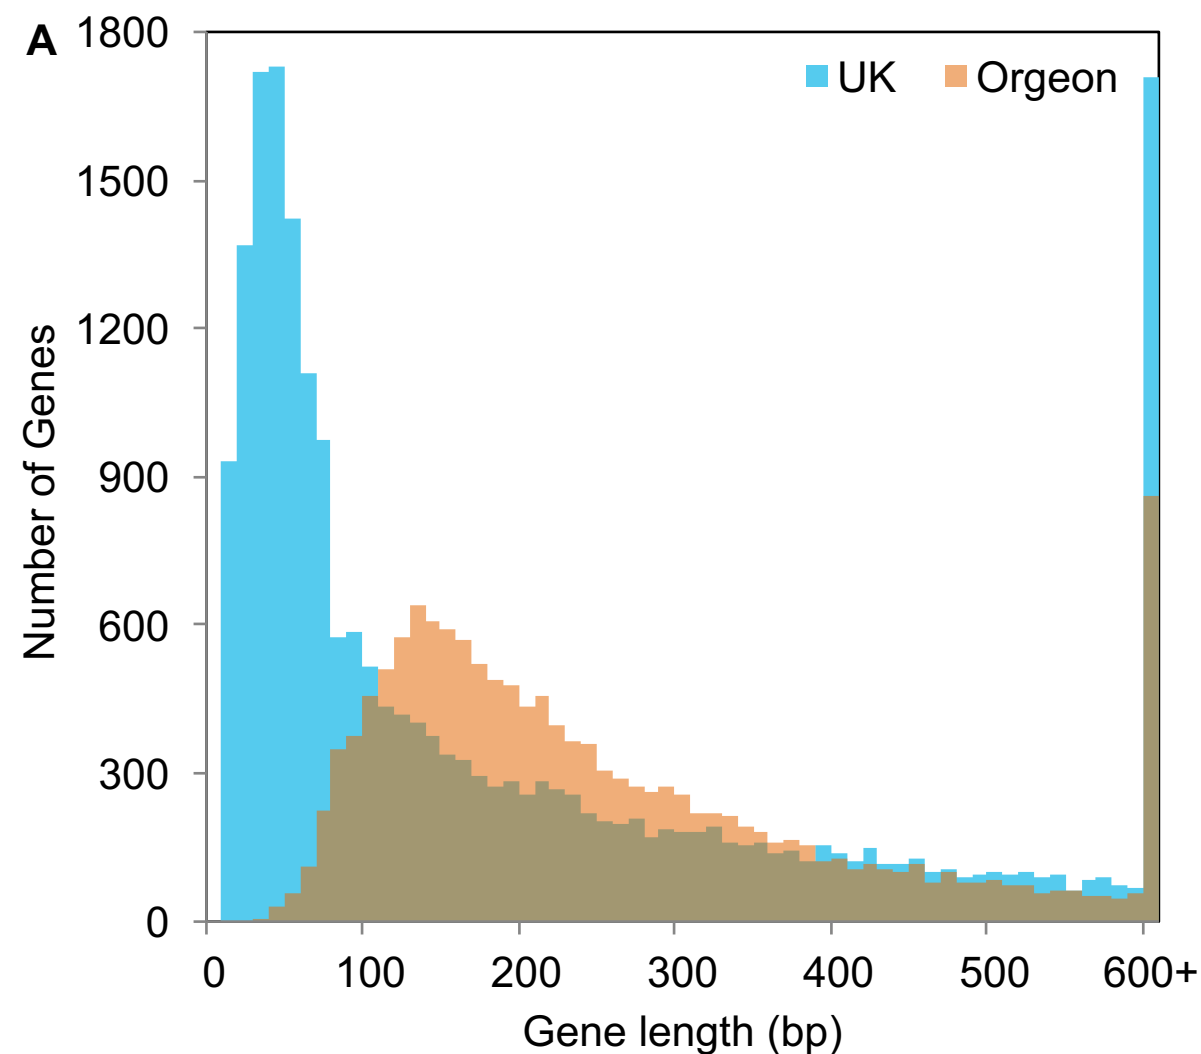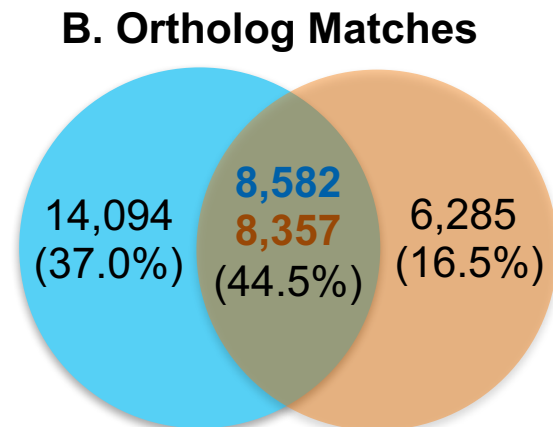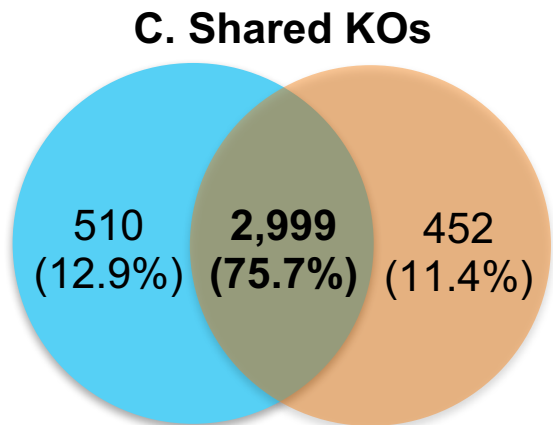

Supplement: S1 (10.1371/journal.pgen.1006537.s001) [file journal.pgen.1006537.s001]
